# Supplementary material
Source: PubMed Central journal article supplement (PMC4696899)

## **SUPPLEMENTAL MATERIAL**

**Supplemental Table I. Incidence Rates (95% CI) and Hazard Ratios (95% CI) of Definite and Probable Total Stroke in Relation to D-dimer, the ARIC Study, 1993-2012.**

|                               | D-dimer Quintiles, $\mu\text{g/ml}$ |                   |                   |                   |                    | $P_{\text{TREND}}$ | Continuous D-dimer                    |
|-------------------------------|-------------------------------------|-------------------|-------------------|-------------------|--------------------|--------------------|---------------------------------------|
|                               | Q1<br>( $\leq 0.14$ )               | Q2<br>(0.15-0.22) | Q3<br>(0.23-0.32) | Q4<br>(0.33-0.49) | Q5<br>( $> 0.49$ ) |                    | Per 1-SD $\text{Log}_e$<br>increment* |
| <b>Total Stroke</b>           |                                     |                   |                   |                   |                    |                    |                                       |
| Definite plus probable stroke |                                     |                   |                   |                   |                    |                    |                                       |
| Events, n                     | 114                                 | 123               | 151               | 127               | 204                |                    |                                       |
| Incidence rate <sup>†</sup>   | 3.0 (2.5-3.6)                       | 3.0 (2.5-3.6)     | 4.1 (3.5-4.8)     | 3.9 (3.3-4.7)     | 6.1 (5.3-6.9)      |                    |                                       |
| Model 1 HR                    | 1 (Referent)                        | 0.92 (0.71-1.18)  | 1.13 (0.88-1.45)  | 0.99 (0.76-1.28)  | 1.43 (1.12-1.82)   | 0.001              | 1.11 (1.03-1.20)                      |
| Model 2 HR                    | 1 (Referent)                        | 0.89 (0.69-1.16)  | 1.04 (0.81-1.33)  | 0.86 (0.66-1.12)  | 1.30 (1.02-1.67)   | 0.001              | 1.09 (1.002-1.18)                     |
| Model 3 HR                    | 1 (Referent)                        | 0.90 (0.70-1.17)  | 1.04 (0.81-1.34)  | 0.85 (0.65-1.11)  | 1.30 (1.02-1.67)   | 0.002              | 1.08 (1.00-1.17)                      |
| Definite stroke               |                                     |                   |                   |                   |                    |                    |                                       |
| Events, n                     | 93                                  | 95                | 122               | 101               | 157                |                    |                                       |
| Incidence rate <sup>†</sup>   | 2.4 (2.0-3.0)                       | 2.3 (1.9-2.9)     | 3.3 (2.8-4.0)     | 3.1 (2.6-3.8)     | 4.7 (4.0-5.5)      |                    |                                       |
| Model 1 HR                    | 1 (Referent)                        | 0.86 (0.65-1.15)  | 1.10 (0.83-1.45)  | 0.95 (0.71-1.26)  | 1.33 (1.01-1.74)   | 0.004              | 1.09 (0.99-1.18)                      |
| Model 2 HR                    | 1 (Referent)                        | 0.85 (0.64-1.13)  | 1.02 (0.77-1.34)  | 0.84 (0.62-1.12)  | 1.24 (0.94-1.63)   | 0.011              | 1.07 (0.97-1.17)                      |
| Model 3 HR                    | 1 (Referent)                        | 0.85 (0.64-1.14)  | 1.02 (0.77-1.34)  | 0.83 (0.62-1.12)  | 1.22 (0.93-1.61)   | 0.016              | 1.06 (0.97-1.16)                      |
| Probable stroke               |                                     |                   |                   |                   |                    |                    |                                       |
| Events, n                     | 21                                  | 28                | 29                | 26                | 47                 |                    |                                       |
| Incidence rate <sup>†</sup>   | 0.5 (0.4-0.8)                       | 0.7 (0.5-1.0)     | 0.8 (0.6-1.1)     | 0.8 (0.5-1.2)     | 1.4 (1.0-1.9)      |                    |                                       |
| Model 1 HR                    | 1 (Referent)                        | 1.14 (0.64-2.00)  | 1.25 (0.71-2.20)  | 1.16 (0.64-2.08)  | 1.86 (1.09-3.18)   | 0.008              | 1.20 (1.02-1.41)                      |
| Model 2 HR                    | 1 (Referent)                        | 1.09 (0.62-1.92)  | 1.11 (0.62-1.97)  | 0.92 (0.50-1.69)  | 1.57 (0.91-2.70)   | 0.044              | 1.16 (0.97-1.38)                      |
| Model 3 HR                    | 1 (Referent)                        | 1.11 (0.63-1.97)  | 1.13 (0.63-2.00)  | 0.92 (0.50-1.69)  | 1.63 (0.94-2.81)   | 0.033              | 1.17 (0.98-1.39)                      |

Model 1: Hazard ratio (HR) with 95% confidence interval from Cox proportional hazards model adjusted for age, sex and race–field center.

Model 2: Model 1 additionally adjusted for education level, smoking status, alcohol intake, body mass index, systolic blood pressure, antihypertensive medication use, diabetes status, total and HDL cholesterol.

Model 3: Model 2 additionally adjusted for prevalent left ventricular hypertrophy, atrial fibrillation, peripheral artery disease and heart failure.

\* 1  $\text{Log}_e$  standard deviation (SD) = 0.97  $\text{log}_e \mu\text{g/ml}$ .

† Unadjusted incidence rate per 1,000 person-years with 95% confidence interval.

ARIC, Atherosclerosis Risk in Communities; CI, confidence interval; HR, hazard ratio; SD, standard deviation.

**Supplemental Figure IA.** Restricted cubic spline depicting relationship between log D-dimer and incident total stroke adjusted for age, sex, race and center. Reference value = -1.347 (median). 95% confidence intervals displayed in broken lines. Knots shown as dots set at 5th, 35th, 65th, and 95th percentiles. (Test for non-linear relation = 0.19.)

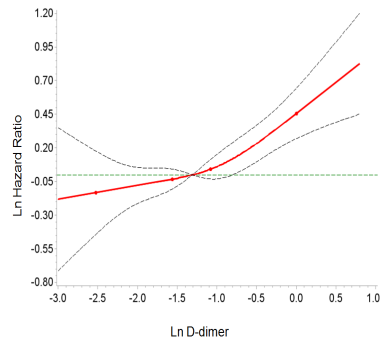

**Supplemental Figure IB.** Restricted cubic spline depicting relationship between log D-dimer and incident ischemic stroke adjusted for age, sex, race and center. Reference value = -1.347 (median). 95% confidence intervals displayed in broken lines. Knots shown as dots set at 5th, 35th, 65th, and 95th percentiles. (Test for non-linear relation = 0.42.)

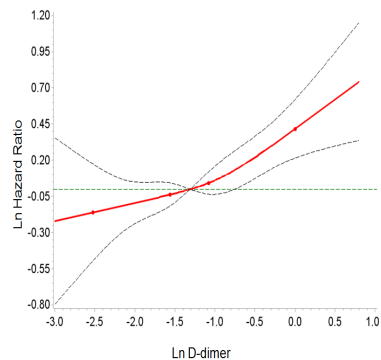

**Supplemental Figure IC.** Restricted cubic spline depicting relationship between log D-dimer and incident cardioembolic stroke adjusted for age, sex, race and center. Reference value = -1.347 (median). 95% confidence intervals displayed in broken lines. Knots shown as dots set at 5th, 35th, 65th, and 95th percentiles. (Test for non-linear relation = 0.80.)

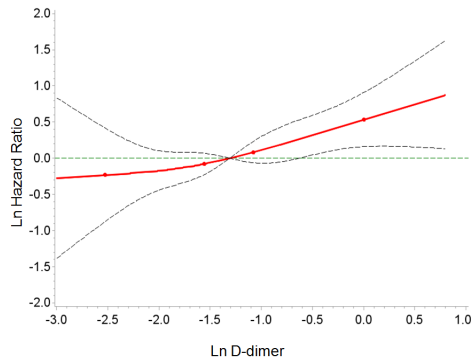

Supplement: NIHMS731813-supplement-ONLINE_SUPPLEMENT.pdf [file NIHMS731813-supplement-ONLINE_SUPPLEMENT.pdf]
