# Supplementary material
Source: PubMed Central journal article supplement (PMC4696899)
Supplement: NIHMS731813-supplement-Acknowledgment_permission_form_-_Cornell.pdf [file NIHMS731813-supplement-Acknowledgment_permission_form_-_Cornell.pdf]

**Acknowledgment Permission Form**

Journal Stroke  
Manuscript No. 011035R3  
First author Aaron Folcum  
Title of work Plasma D-Dimer and Incidence

*of Ischemic stroke and Coronary Heart Disease:  
the Atherosclerosis Risk in Communities Study*

**Acknowledgment Permission:**

Authors must provide written permission/approval from all individuals mentioned by name in the Acknowledgements section of a submitted manuscript. By signing this form, any and all acknowledged persons therefore state that they have read and approved the mention of their names in the Acknowledgment section of the aforementioned paper.

Printed Name Ethne Cornell  
Signature Ethne Cornell  
Date 10-19-15  
Printed Name \_\_\_\_\_  
Signature \_\_\_\_\_  
Date \_\_\_\_\_  
Printed Name \_\_\_\_\_  
Signature \_\_\_\_\_  
Date \_\_\_\_\_  
Printed Name \_\_\_\_\_  
Signature \_\_\_\_\_  
Date \_\_\_\_\_

*Fax to Kate Bifulck at STROKE*

*617-542-6539*
